# Supplementary material for: Synthesis and anticancer properties of fucoidan-mimetic glycopolymer coated gold nanoparticles
Source: Royal Society of Chemistry journal article supplement (doi:10.1039/c5cc02387d), 2015-01-01
Supplement: c5cc02387d1.pdf [file c5cc02387d1.pdf]

## Supporting Information

### Synthesis and Anticancer Properties of Fucoidan-Mimetic Glycopolymer Coated Gold Nanoparticles

Mattias Tengdelius,<sup>a,b,f</sup> Deepanjali Gurav,<sup>c,d,f</sup> Peter Konradsson,<sup>a,b</sup> Peter Pålsson,<sup>a,b</sup> May Griffith,<sup>b,e</sup> Oommen P. Oommen<sup>c,\*</sup>

<sup>a</sup> Division of Organic Chemistry, Linköping University, SE-581 83, Linköping, Sweden.

<sup>b</sup> Integrative Regenerative Medicine Center (IGEN), Linköping University, SE-581 83, Linköping, Sweden.

<sup>c</sup> Department of Chemistry, Ångström Laboratory, Uppsala University, S-75121 Uppsala, Sweden.

<sup>d</sup> Department of Chemistry, Savitri Bai Phule Pune University, India.

<sup>e</sup> Division of Molecular Physics, Department of Physics, Biology and Chemistry (IFM), Division of Cell Biology, Department of Clinical and Experimental Medicine (IKE), Linköping University, SE-581 83, Linköping, Sweden.

<sup>f</sup> These authors contributed equally

\*oommen.op@kemi.uu.se

**General Methods.** All chemicals used were purchased from Sigma-Aldrich unless stated otherwise. <sup>1</sup>H NMR spectra (300 MHz) were recorded on a Varian 300 spectrometer in D<sub>2</sub>O at 25°C. The resonance of the deuterated solvent was used as internal standard for all compounds (<sup>1</sup>H NMR,  $\delta = 4.79$ )<sup>1</sup>. NMR spectra were processed in MestReNova v8.1.2-11880. Dialysis was performed using Spectra/Por<sup>®</sup> Dialysis Membrane 6. Prior to all dialyses filtering was done using Acrodisc<sup>®</sup> LC PVDF 0.45  $\mu$ m filters. Gel permeation chromatography (GPC) was done at Polymer Standards Service GmbH, Mainz, Germany using a PG13 instrument equipped with a PSS SECcurity 1100 HPLC pump; a PSS MCX, 10  $\mu$ m, Guard, ID 8.0 mm x 50 mm precolumn; a PSS MCX, 10  $\mu$ m, 1000 Å, ID 8.0 mm x 300 mm column; a PSS MCX, 10  $\mu$ m, 100000 Å, ID 8.0 mm x 300 mm column and a PSS SECcurity refractive index detector with 0.05 M KH<sub>2</sub>PO<sub>4</sub> /

0.05 M  $K_2HPO_4$  in deionized water as eluent at a flow rate of 1.0 mL/min at 23.0°C. Calibration was done with dextran/pullulan standards. Chromatograms were processed using the PSS – WinGPC UniChrom Version 8.2 software. Elemental analysis was performed at Eurofins Mikro Kemi AB, Uppsala, Sweden. The particle size determination was performed in Zetasizer Nano ZS from Malvern at 25 °C and UV-Vis spectroscopy was performed in Lambda 35 UV-Vis spectrophotometer from PerkinElmer. SEM images of Glycopolymer coated gold nanoparticles were recorded using SEM, MERLIN Zeiss.

**Synthesis of Glycopolymer 2.** 2-Methacrylamidoethyl 2,3,4-tri-*O*-Acetyl- $\alpha$ -L-fucopyranoside (**1**)<sup>2</sup> (2.025 g, 5.045 mmol, 1 equiv.), 2-(trimethylsilyl)ethanethiol (0.0325 mL, 0.203 mmol, 0.04 equiv.) and AIBN (0.0082 g, 0.050 mmol, 0.01 equiv.) were dissolved in 1,4-dioxane (4.465 mL). The solution was degassed through bubbling with  $N_2(g)$  for 20 minutes and then stirred at 70°C under an  $N_2(g)$  stream for 6 hours until the solution turned viscous. Another 5 mL 1,4-dioxane was added and the temperature was raised to 80°C to lower the viscosity. The per-acetylated glycopolymer was precipitated by adding the solution drop-wise to 900 mL diethyl ether and then stirred at room temperature overnight. Filtration, washing with diethyl ether and drying under vacuum for 48 hours gave the per-acetylated glycopolymer (1.186 g) as a white powder.

The per-acetylated glycopolymer (1.178 g) was suspended in methanol (40 mL) and sodium methoxide (0.160 g, 2.962 mmol) added. The suspension was stirred at room temperature for 2 days, during which the suspension turned into a homogenous solution. The solution was neutralized by addition of Dowex Marathon C, filtered and the beads washed with methanol. The solvent was evaporated and the crude glycopolymer re-dissolved in deionized water. Dialysis against deionized water (MWCO 1000) followed by lyophilisation afforded glycopolymer **2**

(0.719 g, 53% monomer conversion over two steps) as a white powder. GPC analysis gave  $M_n = 90600$  Da,  $M_w = 119000$  and PDI = 1.32.

**Synthesis of FM-Glycopolymer 3.** Glycopolymer **2** (0.062 g) was dissolved in DMF (22 mL) upon which sulfur trioxide pyridine complex (0.538 g, 3.380 mmol, 5 equiv. per hydroxyl group) was added and a precipitate formed almost instantly. The precipitate was scraped off the walls of the flask, crushed with a spatula and stirred at room temperature for 2 days. Further precipitation was allowed by cooling in a freezer for 3 hours and the solution then decanted off. The precipitate was dissolved in a solution of  $\text{NaHCO}_3$  (0.752 g, 8.951 mmol) in deionized water (25 mL) and stirred overnight. The solution was dialyzed against deionized water (MWCO 1000) and lyophilized which gave the partially *O*-sulfated FM-glycopolymer **3** (0.108 g) as a white powder. Elemental analysis showed contents to be carbon 24.9 wt. % and sulfur 14.4 wt. % corresponding to an 87% conversion of hydroxyl groups to sulfate esters.

**Synthesis of FM-Glycopolymer stabilized AuNPs (FMG-AuNP).** AuNPs were prepared by chemical reduction of gold salts to yield the corresponding gold nanoparticle by using  $\text{NaBH}_4$  as the reducing agent. Briefly,  $\text{HAuCl}_4$  (7.5 mg, 0.0190 mmol, 1 equivalents) was dissolved in 7 mL deionized water and refluxed for 2 hours. This resultant gold solution was cooled to 60 °C. FM-glycopolymer **3** (15.0 mg, 2 equivalents with respect to L-fucoside repeat units) was dissolved separately in 15 mL of deionized water and quickly added to gold solution under vigorous magnetic stirring.  $\text{NaBH}_4$  (0.35 mg, 0.009 mmol, 0.5 equivalent) was dissolved in 1 mL cold deionized water immediately before use. After stirring for 20 min, the  $\text{NaBH}_4$  solution was added to the mixture solution with vigorous stirring. The formation of NP was initiated within 10 min,

and the reaction was continued overnight at 60 °C. Formation of AuNP could be observed by the appearance of a deep wine red color. This AuNP solution was subsequently loaded into a dialysis bag (MWCO 3500), dialyzed against deionized water (2 × 2L) for 48 h and lyophilized to obtain 16 mg of FMG-Au-NP as a purple powder material. The  $\lambda_{\text{max}}$  for AuNP was found to be 530 nm using UV spectrophotometer.

### Synthesis of Chondroitin Sulfate-A coated gold nanoparticles

CS-Au-NP was synthesized following the protocol presented for FMG-Au-NP with slight modification. Briefly, H<sub>2</sub>AuCl<sub>4</sub> (11.82 mg, 0.03 mmol, 0.5 equivalents) was dissolved in 10 mL deionized water and refluxed for 2 hours. This resultant gold solution was cooled to 60 °C. Chondroitin sulfate-A (30.0 mg, 1 equivalent with respect to disaccharide units) was dissolved separately in 10 mL of deionized water and added to gold solution under vigorous magnetic stirring. NaBH<sub>4</sub> (4.56 mg, 0.12 mmol, 2 equivalents) was added to this solution. The formation of NP was observed immediately with the appearance of violet color and the reaction was progressed for 8 h at 60 °C. This AuNP solution was subsequently loaded into a dialysis bag (MWCO 3500), dialyzed against deionized water (4 × 2L) for 48 h and lyophilized to obtain 28 mg of CS-Au-NP as a purple powder material.

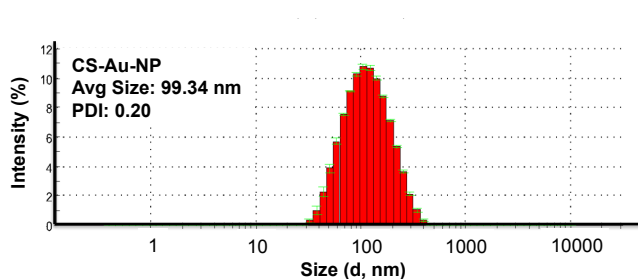

**Figure S1.** Dynamic light scattering profile of CS-Au-NP in 1 mg/mL concentration measured in deionized water.

### **Dynamic light scattering study**

The particle size distribution of FMG-AuNP before and after lyophilization was carried out using Malvern laser granulometer (Zetasized Nano ZS, Malvern, United Kingdom). Freeze-dried samples were dissolved in deionised water at 1 mg/ml concentration before performing the DLS measurement.

### **Thermogravimetric Analysis:**

Thermogravimetric analysis was performed on a Q500 TGA (TA instruments) in air or N<sub>2</sub> atmosphere (gas flow = 60 ml min<sup>-1</sup>). Samples (1 mg) were placed on a platinum plate and heated in the TGA at a rate of 20 °C min<sup>-1</sup> up to 800 or 1000 °C.

### **Scanning electron microscopy**

FMG-Au-NP was dissolved in deionised water at 1 mg/ml concentration. SEM experiment was performed, by placing a drop of the dissolved sample on silicon wafer chip. Then, these samples were air dried and then dried under vacuum at 5.00 kV voltage. Thereafter, micrographs were taken by using a Zeiss Scanning Microscope MERLIN.

### **Cytotoxicity Studies and Caspase Activity**

Cell viability study and caspase activity was measured using, ApoTox-Glo™ Triplex Assay kit following manufacturer's protocol. Briefly, HCT 116 and NIH3T3 cells were seeded in 384 well BD Facon black plates (1000 cells in 50 µL/well) using automated Biomek FX pipetting workstation and incubated at 37 °C for 24 h for cell attachment. Stock solution of FMG and FMG-AuNP was prepared in cell culture medium (DMEM) respectively. After 24 h, different volume of stock solution was added to each well using non-contact acoustic dispenser (Echo 555), to obtain a gradient concentration ranging from 10 µg/mL to 1000 µg/mL and incubated for additional 48 h at 37 °C. After 48 h, 20 µl of medium was treated with 5µl of cell viability

assay reagent, containing both GF-AFC substrate and bis-AAF-R110 substrate and incubated for 30 min at 37 °C. Fluorescence values were recorded at two wavelength sets: 400Ex/505Em (Viability) and 485Ex/520Em (Cytotoxicity) using Envision Multilabel Plate Reader and the cell viability were obtained as a percentage of the untreated control (100% cell viability). Caspase activity was also measured by adding 25µl of Caspase-Glo® 3/7 Reagent to all wells with incubation for 30 min at room temperature, followed by measuring its luminescence with plate reader (Perkin Elmer). All the cell experiments were measured in triplicate.

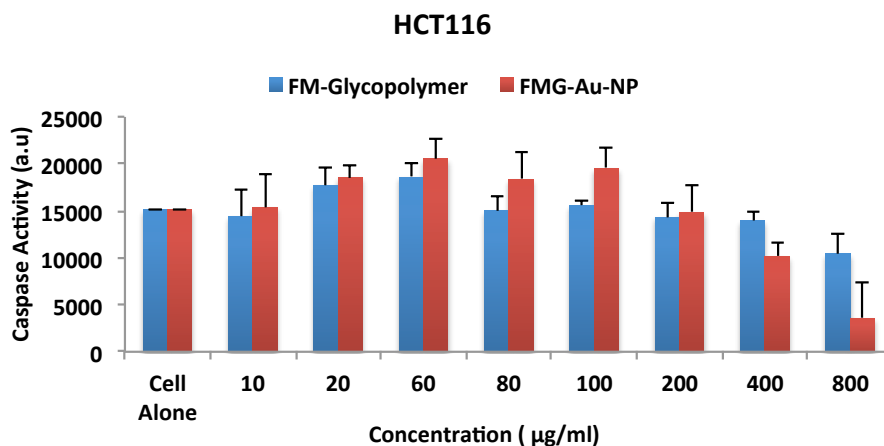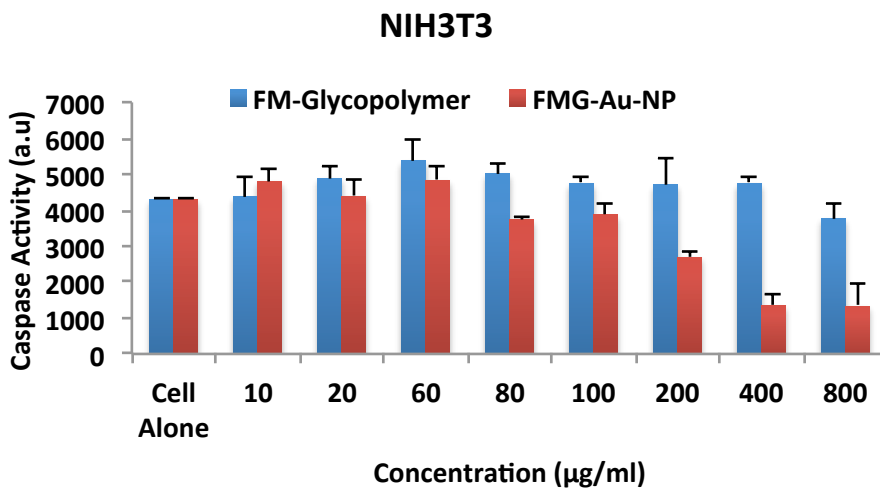

**Figure S2.** Caspase 3/7 activities of HCT116 and NIH3T3 cell line.

## **References**

1. G. R. Fulmer, A. J. M. Miller, N. H. Sherden, H. E. Gottlieb, A. Nudelman, B. M. Stoltz, J. E. Bercaw and K. I. Goldberg, *Organometallics*, 2010, **29**, 2176-2179.
2. M. Tengdelius, C. J. Lee, M. Ggrenegård, M. Griffith, P. Pålsson and P. Konradsson, *Biomacromolecules*, 2014, **15**, 2359-2368.
